# Supplementary material for: Melanin-like polydopa amides – synthesis and application in functionalization of magnetic nanoparticles
Source: Royal Society of Chemistry journal article supplement (doi:10.1039/c4py01467g), 2015-01-01
Supplement: c4py01467g1.pdf [file c4py01467g1.pdf]

## Electronic supplementary information

### Melanin-like Polydopa Amides – Synthesis and Application in Functionalization of Magnetic Nanoparticles

Anca Petran, Radoslaw Mrowczynski, Claudiu Filip, Rodica Turcu, Jürgen Liebscher

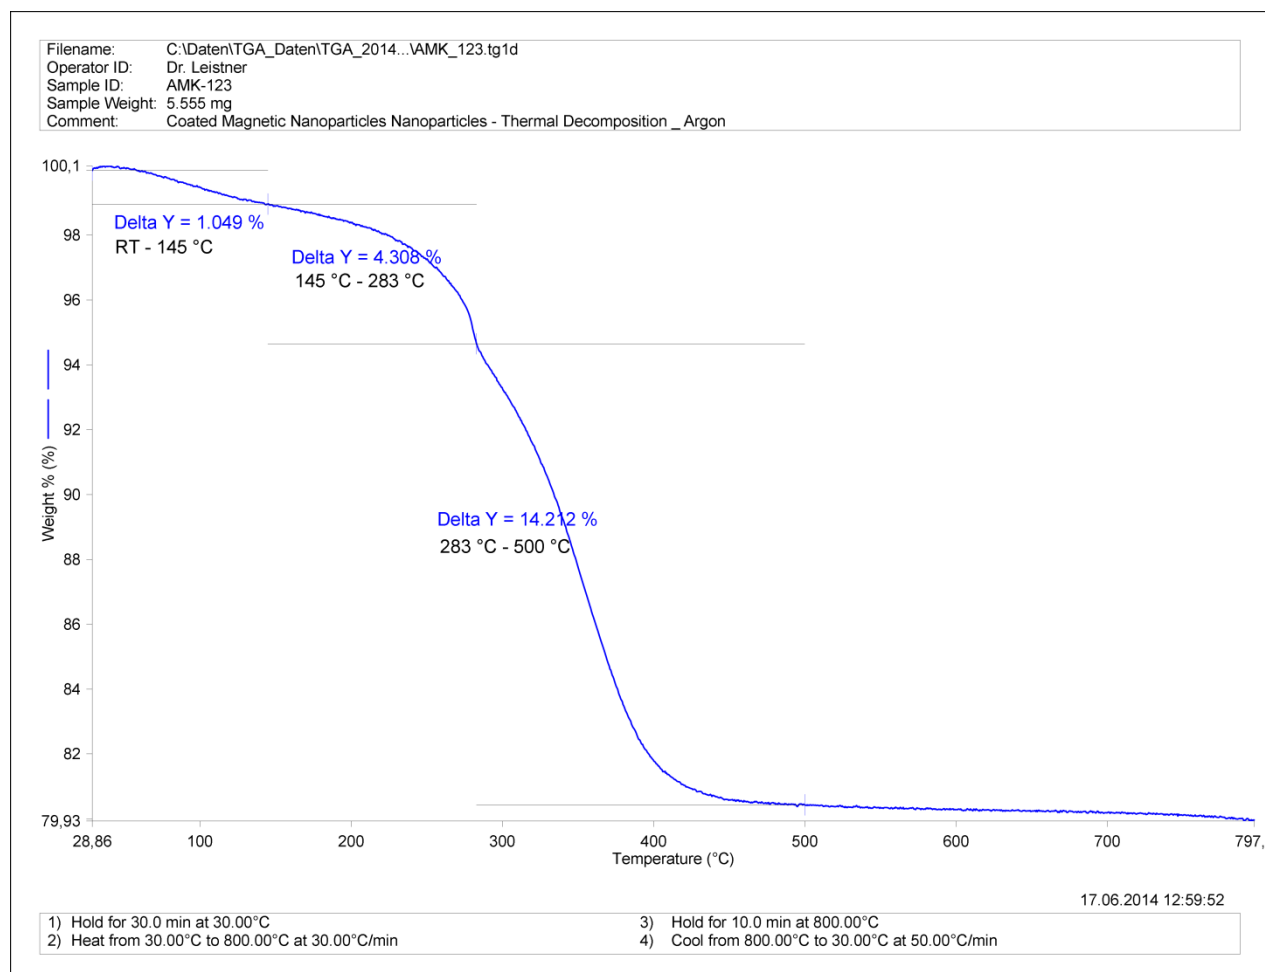

Figure S1. TGA of MNP 5a

Filename: C:\Daten\TGA\_Daten\TGA\_2014...\AMK\_134.tg1d  
Operator ID: Dr. Leistner  
Sample ID: AMK-134  
Sample Weight: 4.971 mg  
Comment: Coated Magnetic Nanoparticles Nanoparticles - Thermal Decomposition \_ Argon

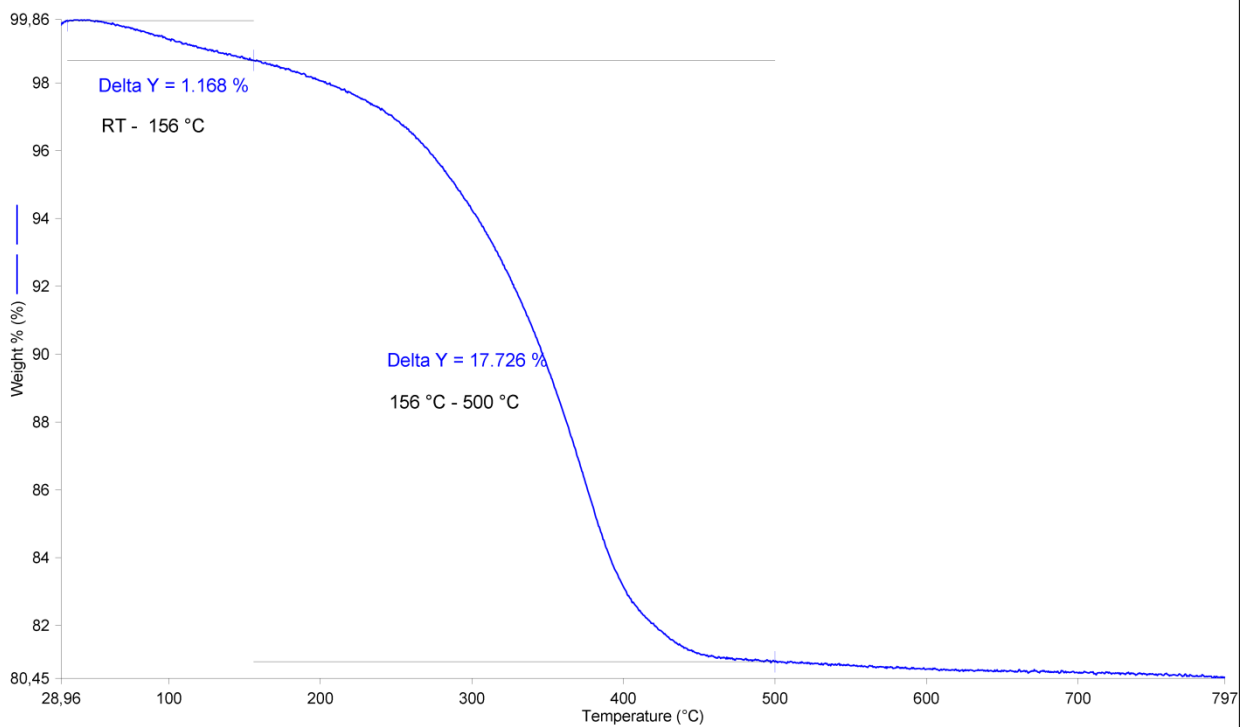

17.06.2014 12:50:37

- 1) Hold for 30.0 min at 30.00°C
- 2) Heat from 30.00°C to 800.00°C at 30.00°C/min
- 3) Hold for 10.0 min at 800.00°C
- 4) Cool from 800.00°C to 30.00°C at 50.00°C/min

Figure S2. TGA of MNP 5b

Filename: C:\Daten\TGA\_Daten\TGA\_2014...\AMK\_119.tg1d  
Operator ID: Dr. Leistner  
Sample ID: AMK-119  
Sample Weight: 5.693 mg  
Comment: Coated Magnetic Nanoparticles Nanoparticles - Thermal Decomposition \_Argon

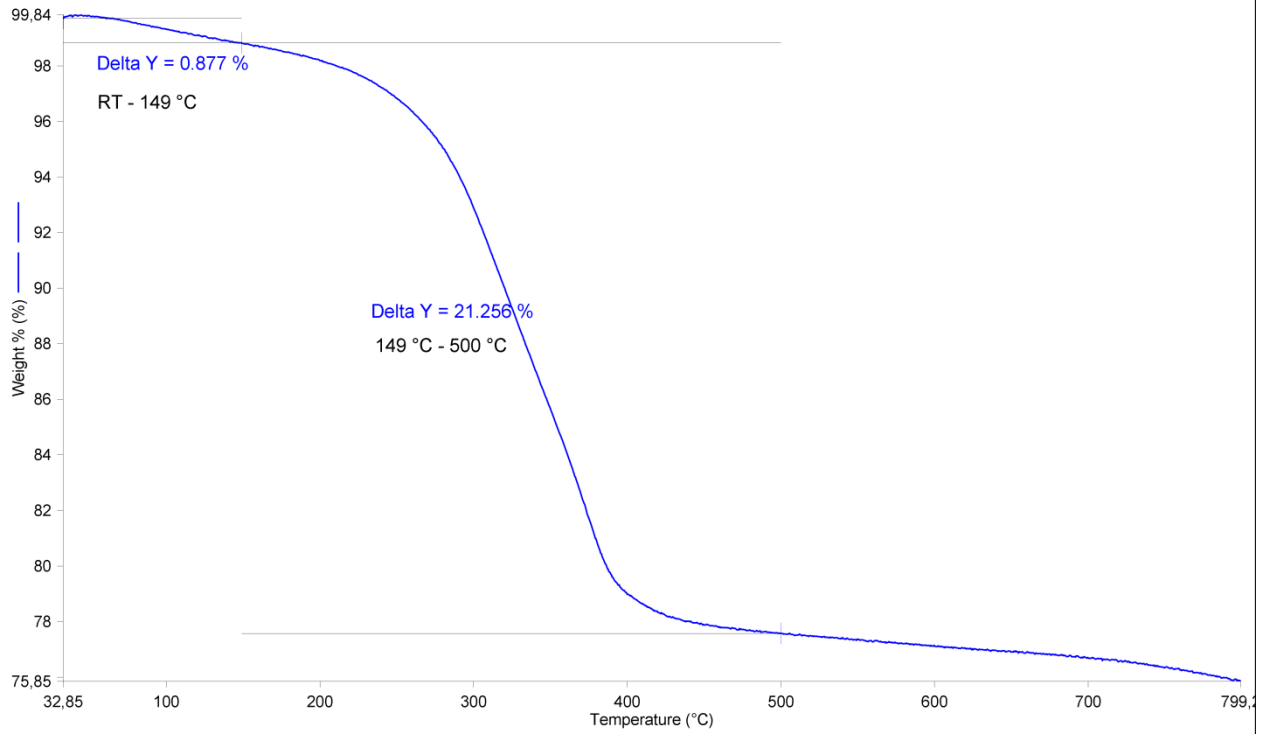

17.06.2014 12:55:21

- 1) Hold for 30.0 min at 30.00°C
- 2) Heat from 30.00°C to 800.00°C at 30.00°C/min
- 3) Hold for 10.0 min at 800.00°C
- 4) Cool from 800.00°C to 30.00°C at 50.00°C/min

Figure S3. TGA of MNP 5c
